# Supplementary material for: Endosomal cargo recycling mediated by Gpa1 and Phosphatidylinositol-3-Kinase is inhibited by glucose starvation
Source: bioRxiv or medRxiv preprint supplement (doi:10.1101/2021.04.02.438183), 2021-12-09
Supplement: Supplementary file [file media-1.pdf]

## SUPPLEMENTAL MATERIAL

# Endosomal recycling to the surface mediated by Gpa1 and PI3-Kinase is inhibited following glucose starvation

### SUPPLEMENTAL FIGURES AND LEGENDS

- Figure S1  
Segmentation and nuclear Mig1 estimates
- Figure S2  
Flow cytometry analysis focussed specifically on transformed cells
- Figure S3  
Localisation of Cos5-GFP
- Figure S4  
Apotome SIM localisation experiments

### SUPPLEMENTAL TABLES

- Supplemental Table S1  
Yeast Strains used in this study
- Supplemental Table S2  
Plasmids used in this study
- Supplemental Table S3  
Raw data for bioinformatics included in Figures 2A, 2B, and 6D

### SUPPLEMENTAL REFERENCES

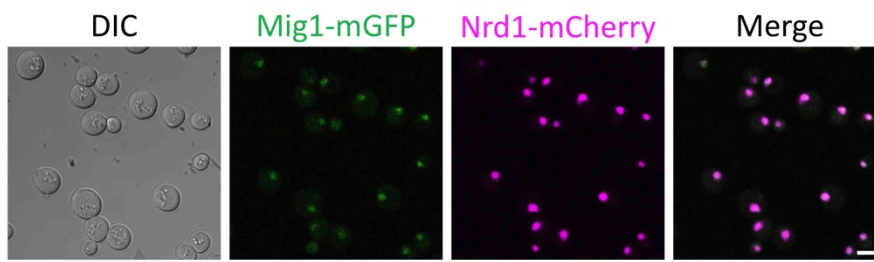

### Whole cell segmentation based on DIC

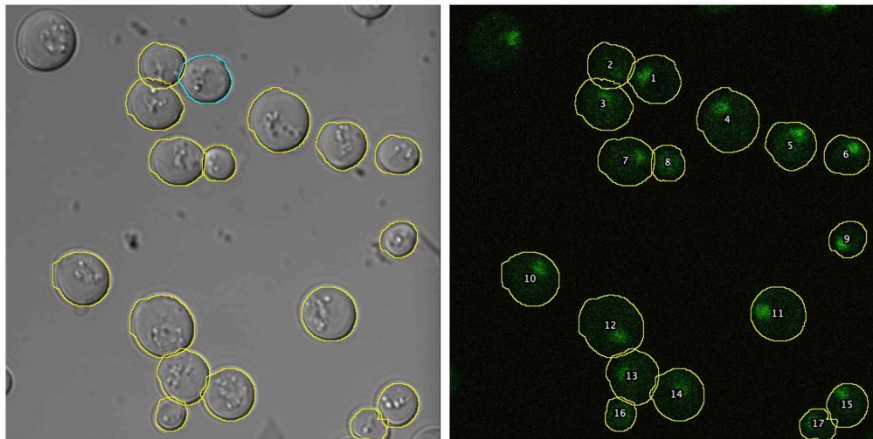

### Nuclear segmentation based on Nrd1-mCherry

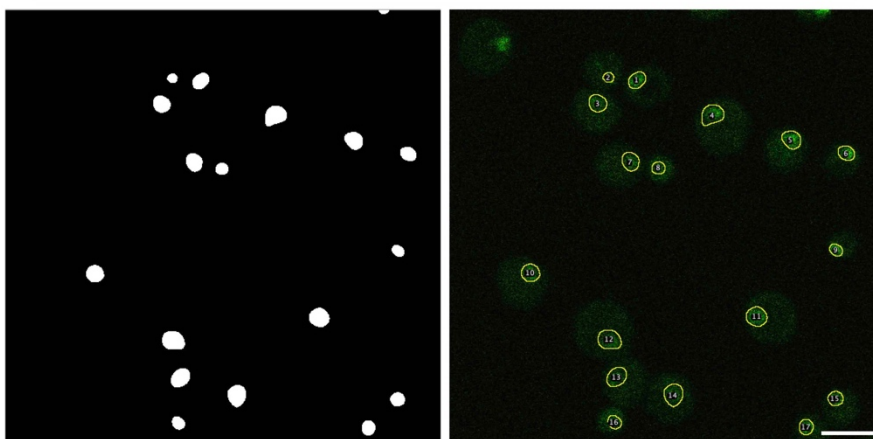

**Figure S1: Segmentation and nuclear Mig1 estimates**

Wild-type cells stably expressing Mig1-mGFP and Nrd1-mCherry were grown to mid-log phase in SC media containing 2% glucose (upper). Using the Cell Magic Wand Plugin (Fiji) set to roughness = 2.0 whole cells were identified from the DIC image, and these segmented regions of interest (ROIs) were applied to the green channel image to calculate the overall Mig1-mGFP fluorescence (middle). For nuclear specific localisations, Otsu segmentation was applied to the red Nrd1-mCherry channel to create nuclear ROIs that were then applied to the same Mig1-mGFP fluorescence channel. Percentage Mig1-mGFP nuclear / total fluorescence was calculated for individual cells across multiple imaging experiments ( $n = 3$ ). The same process was also performed for cells grown in SC media containing raffinose instead of glucose. Scale bar, 5  $\mu$ M.

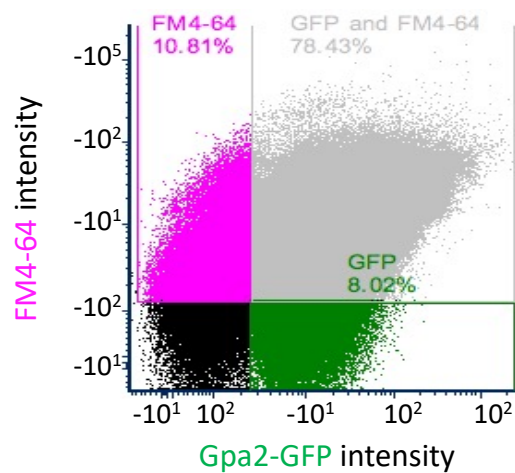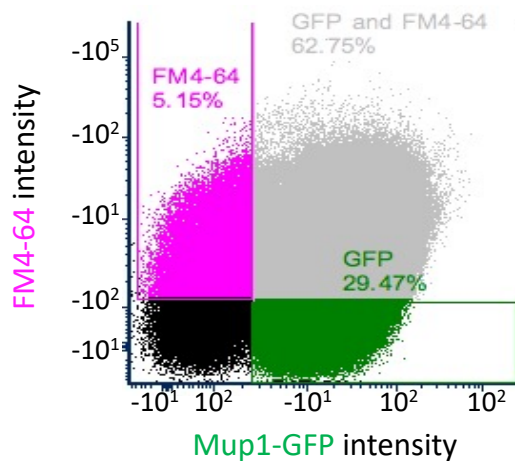

**Figure S2: Flow cytometry analysis focussed specifically on transformed cells**

Wild-type cells expressing either Gpa2-GFP (lower) or Mup1-GFP (lower) were grown to mid-log phase before preparation for FM4-64 efflux assays (see methods). Briefly, cells were loaded with FM4-64 dye, before excess dye was washed with ice cold media. Flow cytometry measurements of cells upon a return to room temperature media was recorded and gates set to only calculate FM4-64 fluorescence from cells also co-expressing either Gpa2-GFP or Mup1-GFP. A decrease in fluorescence is plotted in Figure 7C, calculated from the mean fluorescence from the first 10 seconds of recording, considered 100%, and then applied to all subsequent measurements over the 10-minute period of continuous flow / measurements.

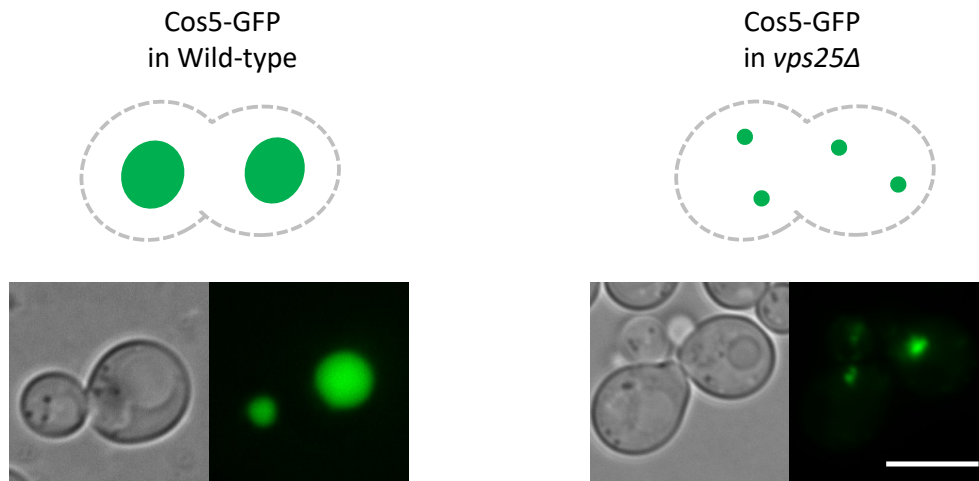

**Figure S3: Localisation of Cos5-GFP**

Cos5-GFP was expressed from the TDH3 promoter in either wild-type cells (left) or in *vps25Δ* mutants, that are defective in MVB sorting and accumulate cargoes in aberrant endosomes (right). Scale bar, 5  $\mu$ M.

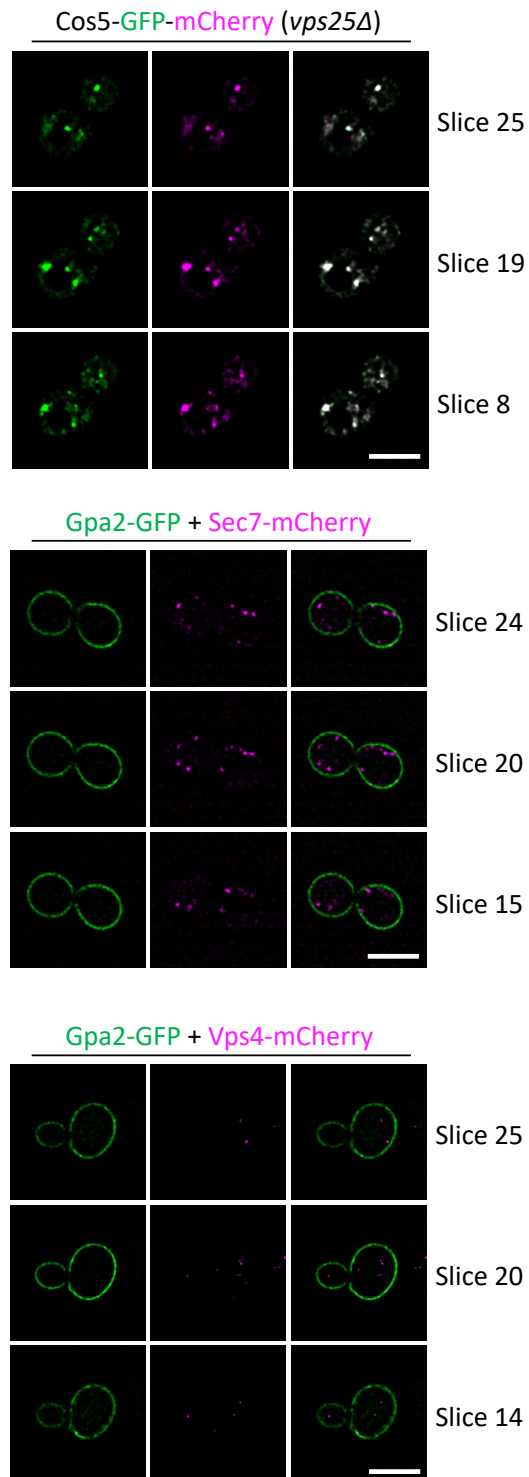

**Figure S4: Apotome SIM localisation experiments**

4D Apotome SIM was achieved across 42 z-stacks (distance  $0.126\mu\text{m}$ ) repeated over 100 time slices, each of 4.3 seconds with no interval period. This approach was used to image: a dual tagged version of Cos5, carrying both GFP and mCherry at the C-terminus was expressed in *vps25Δ* (upper), and wild-type cells co-expressing Gpa2-GFP with either Sec7-mCherry (middle) or Vps4-mCherry (lower). Scale bar,  $5\mu\text{M}$ .

## SUPPLEMENTAL REFERENCES

1. Sikorski, R. S. & Hieter, P. A system of shuttle vectors and yeast host strains designed for efficient manipulation of DNA in *Saccharomyces cerevisiae*. *Genetics* **122**, 19–27 (1989).
2. Stringer, D. K. & Piper, R. C. A single ubiquitin is sufficient for cargo protein entry into MVBs in the absence of ESCRT ubiquitination. *J Cell Biology* **192**, 229–242 (2011).
3. Laidlaw, K. M. E. *et al.* A glucose-starvation response governs endocytic trafficking and eisosomal retention of surface cargoes in budding yeast. *J Cell Sci* **134**, jcs257733 (2020).
4. Urbanowski, J. L. & Piper, R. C. Ubiquitin Sorts Proteins into the Intraluminal Degradative Compartment of the Late-Endosome/Vacuole. *Traffic* **2**, 622–630 (2001).
5. Steinfeld, N. *et al.* Elevating PI3P drives select downstream membrane trafficking pathways. *Mol Biol Cell* **32**, 143–156 (2021).
6. MacDonald, C. *et al.* A Family of Tetraspans Organizes Cargo for Sorting into Multivesicular Bodies. *Dev Cell* **33**, 328–342 (2015).
7. Brachmann, C. B. *et al.* Designer deletion strains derived from *Saccharomyces cerevisiae* S288C: a useful set of strains and plasmids for PCR-mediated gene disruption and other applications. *Yeast* **14**, 115–132 (1998).
8. Bonangelino, C. J., Catlett, N. L. & Weisman, L. S. Vac7p, a novel vacuolar protein, is required for normal vacuole inheritance and morphology. *Mol Cell Biol* **17**, 6847–6858 (1997).
9. Adell, M. A. Y. *et al.* Recruitment dynamics of ESCRT-III and Vps4 to endosomes and implications for reverse membrane budding. *Elife* **6**, e31652 (2017).
10. Winzeler, E. A. *et al.* Functional characterization of the *S. cerevisiae* genome by gene deletion and parallel analysis. *Science* **285**, 901–906 (1999).
11. Wollman, A. J. *et al.* Transcription factor clusters regulate genes in eukaryotic cells. *Elife* **6**, e27451 (2017).
